# Supplementary material for: The Volcanic Hazards of Jan Mayen Island (North-Atlantic)
Source: Frontiers journal article supplement (doi:10.3389/feart.2022.730734), 2022-03-04
Supplement: Table_1.DOCX [file Table_1.DOCX]

Supplementary Material

# Supplementary Data

The supplementary data is uploaded in a separate zip file. A short description of the content of the zip file is given below.

**Zip file contents:**

The zip file contains txt and raster layers for geographical information systems. The raster layers are described below in alphabetical order (the maps were made using EPSG:2158 – IRENET95 / UTM zone 29N as the co-ordinate reference system).

**Pyroclastic_susceptibility**

Contains areas below 200 m altitude (a.s.l.), and within 2 km of the coastline.

**Spatial_SAMSE**

Contains the volcanic susceptibility map generated using the Sum of Asymptotic Mean Square Error (SAMSE) bandwidth in QVAST, also shown in figure 3 C. In the figure values are classed in 5 bins; 0-0.8 * 10-5, 0.8-1.6 * 10-5, 1.6-2.4 * 10-5, 2.4-3.2 * 10-5 and > 3.2 * 10-5.

**Spatial_LSCV**

Contains the volcanic susceptibility map generated using the Least Square Cross Validation bandwidth (LSCV) bandwidth in QVAST, also shown in figure 3 B. In the figure values are classed in 5 bins; 0-0.8 * 10-5, 0.8-1.6 * 10-5, 1.6-2.4 * 10-5, 2.4-3.2 * 10-5 and > 3.2 * 10-5.

**Lava_innundation**

Contains the lava inundation map generated using Q-LavHA, also shown in figure 6. All cell values in this raster have been multiplied by 107.

**Vulcanian_long_term**

Contains the qualitative long-term tephra hazard for Vulcanian to Strombolian eruptions, created by making a 2 km buffer around the different levels of the SAMSE volcanic susceptibility map. Cells have values from 1 to 5, where 1 represents the lowest hazard level and 5 represents the highest hazard level.

**Tephra_Hekla1947SeptemberApril_10kg**

Contains the tephra fall hazard map showing the probability of reaching a mass accumulation of 10 kg/m2 (in percent) for the Hekla 1947 eruption scenario, with wind conditions from September to April. This map is also shown in figure 5D with values classed in five bins; 0-10 %, 10-25 %, 25-50 %, 50-75 % and 75-100 %.

**Tephra_Hekla1947MayAugust_10kg**

Contains the tephra fall hazard map showing the probability of reaching a mass accumulation of 10 kg/m2 (in percent) for the Hekla 1947 eruption scenario, with wind conditions from May to August. This map is also shown in figure 5C with values classed in five bins; 0-10 %, 10-25 %, 25-50 %, 50-75 % and 75-100 %.

**Tephra_Hekla1947allseasons_10kg**

Contains the tephra fall hazard map showing the probability of reaching a mass accumulation of 10 kg/m2 (in percent) for the Hekla 1947 eruption scenario, with all year wind conditions. This map is also shown in figure 5B with values classed in five bins; 0-10 %, 10-25 %, 25-50 %, 50-75 % and 75-100 %.

**Tephra_Hekla2000_10kg**

Contains the tephra fall hazard map showing the probability of reaching a mass accumulation of 10 kg/m2 (in percent) for the Hekla 2000 eruption scenario, with all year wind conditions. This map is also shown in figure 5A with values classed in five bins; 0-10 %, 10-25 %, 25-50 %, 50-75 % and 75-100 %.

**Tephra_Vulcanian10km_10kg**

Contains the tephra fall hazard map showing the probability of reaching a mass accumulation of 10 kg/m2 (in percent) for the Vulcanian 10 km eruption plume scenario, with all year wind conditions. This map is also shown in figure 5E with values classed in five bins; 0-10 %, 10-25 %, 25-50 %, 50-75 % and 75-100 %.

**Tephra_Vulcanian5km_1kg**

Contains the tephra fall hazard map showing the probability of reaching a mass accumulation of 1 kg/m2 (in percent) for the Vulcanian 5 km eruption plume scenario, with all year wind conditions. This map is also shown in figure 5F with values classed in five bins; 0-10 %, 10-25 %, 25-50 %, 50-75 % and 75-100 %.

**Qualitative_haz**

Contains the qualitative volcanic hazard map for Jan Mayen also shown in figure 8.

**TXT files**

These contain UTM point co-ordinates for various infrastructure and volcanic vents according to the names of the individual files.

Other files used in this project are a DEM from the Norwegian Polar Institute (<https://doi.org/10.21334/npolar.2014.e2b2417e>), and shape files from the J100 Kartdata dataset (<https://doi.org/10.21334/npolar.2014.f16ab884>), also from the Norwegian Polar Institute.

# Supplementary Figures


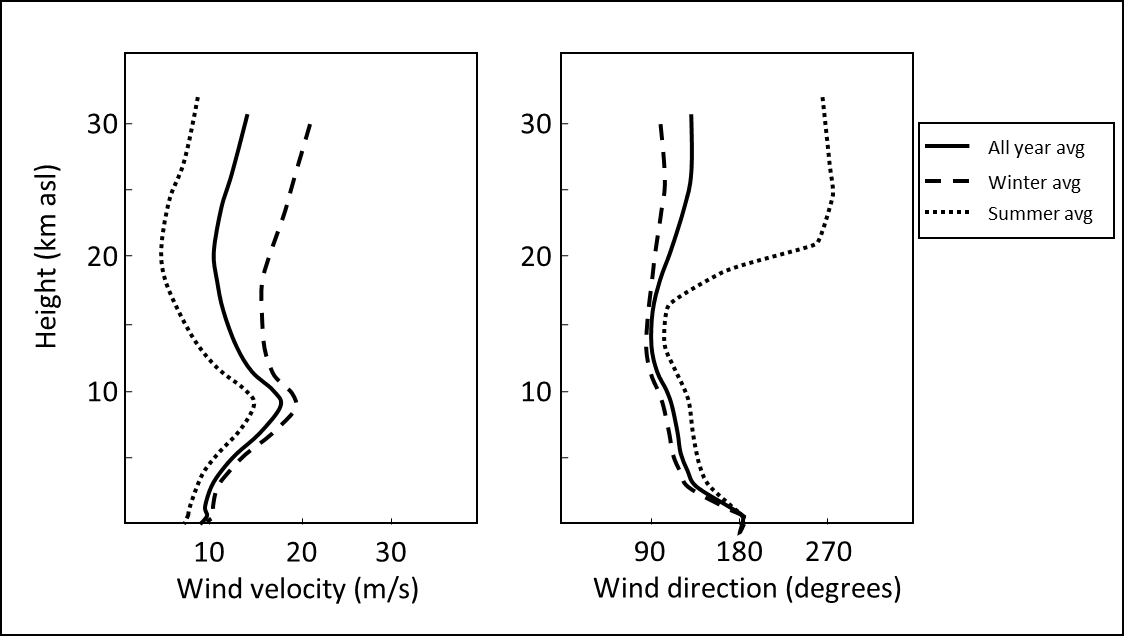


**Supplementary Figure 1.**

Plots of median wind velocity in meters per second and median wind direction (the direction that wind is blowing towards) in degrees plotted against height in km above sea level for the co-ordinates of Jan Mayen (2005-2014 wind data from the NOAA NCEP/NCAR reanalysis database, Kalnay et al. 1996). There is a clear seasonality in both velocity and direction, especially above 15 km. During the summer months (May, June, July and August), the wind velocity drops and the wind direction changes from around 90 degrees to approximately 270 degrees at greater than 20 km altitude.
